# Supplementary material
Source: PubMed Central journal article supplement (PMC4610407)
Supplement: NIHMS701217-supplement-Blank_Survey.pdf [file NIHMS701217-supplement-Blank_Survey.pdf]

# Research Networking - CTSA Sites Implementation Survey

Thank you for participating in this survey of Research Networking in the CTSA Consortium. This survey could take up to 20 minutes to complete, depending on the maturity level of your institution's research networking system implementation. At any point during the survey, you can save your answers and return later to complete it.

Your effort on this single survey contributes to two separate data-collection initiatives in the Consortium. In one initiative, the CTSA Consortium Coordinating Center (C4) is collecting a broad inventory of clinical and translational science infrastructure across the CTSA Consortium. At the conclusion of this cataloging project, C4 will create an online, user-friendly interface to share the data with you. In another initiative, the Research Networking Affinity Group is working with Strategic Goal 3 Committee to determine the current state of research networking systems (RNSs) and their implementations at all Consortium sites. This information will help facilitate finding experts and collaborating by 1) knowing how many research profiles there are, 2) what profile information can be shared, and 3) which RNSs comply with the open, shareable data Recommendations for Research Networking approved by the CTSA Consortium Executive and Steering Committees.

Please use the RNS definition below as a guide.

Thank you!

## RNS Definition:

"Research Networking Systems manage profiles of researchers' interests and accomplishments to support expertise identification and collaborative relationships for productive research, actionable institutional intelligence, and timely administration and evaluation."(1,2)

(1) Association of American Medical Colleges (AAMC). (2012, March). Technology now: research networking. Retrieved 04/11/2012 from <https://www.aamc.org/download/278098/data/technologynowresearchnetworking.pdf>

(2) 2012. T. Schleyer, B. S. Butler, M. Song and H. Spallek, "Conceptualizing and Advancing Research Networking Systems," ACM Transactions on Computer-Human Interactions, In press.

You are providing Researcher Networking System (RNS) information for which institution?

- Albert Einstein College of Medicine
- Boston University
- Case Western Reserve University
- Columbia University
- Duke University
- Emory University
- Children's National Medical Center
- Georgetown University Medical Center
- Harvard University
- Indiana University School of Medicine
- Johns Hopkins University
- Mayo Clinic
- Medical College of Wisconsin
- Mount Sinai School of Medicine
- Northwestern University
- New York University School of Medicine
- The Ohio State University
- Oregon Health & Science University
- Penn State Milton S. Hershey Medical Center
- The Rockefeller University
- The Scripps Research Institute
- Stanford University
- Tufts University
- The University of Alabama at Birmingham
- University of Arkansas for Medical Sciences
- University of California, Davis
- University of California, Los Angeles
- University of California, San Diego
- University of California, San Francisco
- University of Chicago
- University of Cincinnati
- University of Colorado Denver
- University of Florida
- University of Illinois at Chicago
- University of Iowa
- University of Kansas Medical Center
- University of Kentucky
- University of Massachusetts Medical School, Worcester
- University of Michigan
- University of Minnesota Twin Cities
- University of New Mexico Health Sciences Center
- The University of North Carolina at Chapel Hill
- University of Pennsylvania
- University of Pittsburgh
- University of Rochester School of Medicine and Dentistry
- Medical University of South Carolina
- University of Southern California
- University of Texas Southwestern Medical Center at Dallas
- University of Texas Health Science Center at Houston
- University of Texas Medical Branch
- The University of Texas Health Science Center at San Antonio
- The University of Utah
- University of Washington
- University of Wisconsin - Madison
- University of California, Irvine
- Vanderbilt University
- Virginia Commonwealth University
- Washington University
- Weill Cornell Medical College
- Yale University

Which of the following Levels has your institution achieved in implementing a Research Networking System (RNS)? (Please refer to the definitions for answering this question.)

- Not Planning
- Level 0 - Not Begun: Research Networking is on the radar, but no concrete steps have been taken to evaluate needs or resources
- Level 1 - Identification: Evaluating the needs driving research networking. Identifying champions in research and administrative areas. Identifying expertise profile data source(s). Extracting some approved profile data sets and developing some initial pilot projects to evaluate value and institutional strategy for next steps. Evaluating existing research networking tools to determine the best solution for your Institution. Identifying and procuring the necessary resources (financial, management, FTEs, and hardware) for implementation and maintenance.
- Level 2 - Initial Implementation: The above, plus ANY of the FOLLOWING: Installing a Research Networking System using a one-time extraction of public faculty information from an institutional repository combined with grants and/or biomedical publications data from an authoritative source. Demonstrating research networking capabilities locally. Participating in pilot projects of research networking capabilities nationally, such as [direct2experts.org](http://direct2experts.org).
- Level 3 - Managed Implementation: The above, plus regularly updating data in the RN tool.
- Level 4 - Defined Implementation: The above, plus ANY of the FOLLOWING: Regularly exchanging data between the RNS and institutional and external system(s) so that faculty members can update information at any point and it is updated centrally. Providing greater functionality for administrative and research support processes, such as automatic CV and web page generation.
- Level 5 - Optimized Implementation: The above, plus integrating network analyses of team science activities, predictive analytics, and prospective grant opportunity assessment.

How many RNS implementations do you have or plan to have?

- 1
- 2
- 3
- >3
- Unable to determine

Please complete a separate survey for each RNS implementation at your institution. Thank you!

If you are completing separate surveys for each RNS implementation at your institution, please indicate which system you're considering in this particular survey response. You can use the tool name, i.e. VIVO, Profiles, etc., or you can give a unique nickname. This will be used to distinguish your separate survey responses.

---

Which of these is the primary tool used at your institution for Research Networking (the tool you'll consider most in responding to the survey)?

- VIVO
- Profiles
- SciVal Experts
- Research Accelerator
- ResearchGate
- PIVOT
- Research View
- Other:
- Unable to Determine

If 'other', please name the primary tool your institution is using or implementing for Research Networking.

Please briefly list other tools used in Research Networking (for example, if you use SciVal Experts for primary researcher data and expertise identification, do you also use SciVal Funding or SciVal Spotlight? If you primarily use Profiles, are you using VIVO in conjunction but on the same set of researchers and data?):

Please indicate which organization(s) within your institution assumes primary responsibility for the maintenance and sustainability of your RNS, including, but not limited to: system administration, system development, programming, help desk support, training, education, marketing, etc. (choose all that apply):

- Your institution's CTSA center or institute
- Information Technology Group
- Biomedical Informatics Group
- Other Informatics Group
- Faculty Information Group
- Libraries
- Other:
- Unable to determine

Briefly list 'other' organization(s) that assume responsibility for maintenance and sustainability of your RNS:

---

---

## Questions Related to the CTSA Consortium Research Networking Recommendations

The CTSA Consortium encourages all sites to implement research networking systems institution-wide that utilize RDF triples and an ontology compatible with the VIVO ontology with profiles that are publicly available, specifically as Linked Open Data (see below and linked here).

[Inline Image: "ResearchNetworkingRecommendationsPage.png"]

Are your institution's research networking data publicly available as Linked Open Data, specifically within RDF specifications which can be searched as SPARQL endpoints?

- Yes, currently
- Yes, projected within 6 months to one year
- Yes, projected within 2 years
- No, but considering
- No
- Unable to determine

Are your institution's research networking data organized using an ontology?

- Yes, currently
- Yes, projected within 6 months to one year
- Yes, projected within 2 years
- No, but considering
- No
- Unable to determine

Which core ontology is used to organize your institution's research networking data?

- VIVO
- Other:

Briefly list the 'other' core ontology used to organize your institution's research networking data:

---

---

## Questions Related to Research Networking Systems / Tools

Is your RNS open source, proprietary, or do you use a combination of open source and proprietary tools in your system?

- Open source  
 Proprietary  
 Combination

Is your institution currently using any RNS tool to identify research resources or assets such as equipment, specialized reagents, genetic materials, etc.?

- Yes, currently  
 Yes, projected within 6 months to one year  
 Yes, projected within the next 2 years  
 No, but considering  
 No  
 Unable to determine

Which tool is being used at your institution to identify research resources or assets such as equipment, specialized reagents, genetic materials, etc.?

- eagle-i  
 Other:

Briefly list any 'other' tool(s) currently being used at your institution to identify research resources or assets:

If you use separate RNS tools for identifying experts and collaborators and for identifying research resources or assets such as equipment, specialized reagents, genetic materials, etc., do you plan to integrate these?

- Yes    No    Unable to determine

Please briefly describe your tool integration plans here:

---



---

## Questions Related to the Individuals being profiled in your Research Networking System

Do you include personnel outside of traditional health sciences, biomedical sciences or Academic Health Centers in your institution's RNS (e.g. from Schools or Colleges of Engineering, Computer Science, Liberal Arts, Education, Business, Law, etc.)?

- Yes, currently  
 Yes, projected within 6 months to one year  
 Yes, projected within the next 2 years  
 No, but considering  
 No  
 Unable to determine

Briefly list the types of personnel outside of traditional health sciences, biomedical sciences or Academic Health Centers included in your institution's RNS:

How many individuals at your institution are currently being profiled in your RNS?

\_\_\_\_\_

What is the total number of individuals at your institution who could potentially be profiled by your RNS (e.g. individuals other than biomedical researchers from various schools and colleges)? (Estimates are acceptable.)

\_\_\_\_\_

Do you plan to add more individuals' profiles to your RNS tool?

- Yes    No    Unable to determine

How many individuals do you estimate that you will add during the next 2 years? (Leave blank if not known.)

\_\_\_\_\_

What institutional roles are currently included in your RNS profiles (choose all that apply)?

- Tenured Faculty  
 Non-tenured Faculty  
 Adjunct Faculty  
 Professional and Administrative Staff  
 Library Professionals  
 Post-doctoral Fellows or Associates  
 Research Fellows or Associates  
 Graduate students  
 Undergraduate students  
 Administration  
 Other:

Please list 'other' institutional roles included in your RNS Profiles:

What institutional roles do you project adding within the next two years to your RNS profiles (choose all that apply)?

- Tenured Faculty
- Non-tenured Faculty
- Adjunct Faculty
- Professional and Administrative Staff
- Library Professionals
- Post-doctoral Fellows or Associates
- Research Fellows or Associates
- Graduate students
- Undergraduate students
- Administration
- None
- Other:
- Unable to determine

Please list 'other' institutional roles you project adding to your RNS profiles within the next 2 years:

Do you currently provide users with the choice to opt-in or opt-out of your institution's RNS?

- Opt-in
- Opt-out
- Do not provide choice



---

---

## Questions Related to the Data Sources Used to Populate Research Networking System

What are the data source(s) for the demographic data in your RNS (choose all that apply)?

- Institutional Human Resources Repository (e.g. PeopleSoft)
- Other Institutional Repository
- Other:

What 'other' demographic data sources do you use?

How are the demographic data added / updated?

- Automatically ingested
- Manually added/updated by systems administrators
- Manually added/updated by outside contractors
- Manually added/updated by users
- Data are not updated after initial load
- Unable to determine

How frequent are the demographic data updates?

- Daily
- Weekly
- Bi-weekly
- Monthly
- Bi-Monthly
- Quarterly
- Semi-annually
- Annually
- Other:

Which of the following data are also included currently in your RNS (choose all that apply)?

- Publications
- Funded grants
- Funding opportunities
- Patents
- Courses taught
- None
- Unable to Determine
- Other:

Briefly list 'other' types of data included in your RNS:

What data do you plan to add to your RNS within the next 6 months to one year?

- Publications
- Funded grants
- Funding opportunities
- Patents
- Courses taught
- None
- Unable to Determine
- Other:

Briefly list 'other' types of data you plan to add to your RNS within the next 6 months to one year:

Which bibliographic databases are used to populate your researcher profiles?

- PubMed
- Medline
- Scopus
- Web of Knowledge / Web of Science
- Internal publications database(s)
- Other:
- Unable to determine

Briefly list 'other' publication database(s) used to populate your researcher profiles:

How are these bibliographic data being updated by your RNS?

- Automatically ingested
- Manually added/updated by systems administrators
- Manually added/updated by outside contractors
- Manually added/updated by users
- Data are not updated after initial load
- Unable to determine

How frequently are the bibliographic data updated in your RNS?

- Daily
- Weekly
- Bi-weekly
- Monthly
- Bi-Monthly
- Quarterly
- Semi-annually
- Annually
- Other:
- Unable to determine

What funded grants data source(s) do you use (choose all that apply)?

- Internal grants database
- NIHReporter
- Other:
- Unable to determine

Briefly list any 'other' funded grants data source(s) you use here:

How are the funded grants data added / updated?

- Automatically ingested
- Manually added/updated by systems administrators
- Manually added/updated by outside contractors
- Manually added/updated by users
- Data are not updated after initial load
- Unable to determine

How frequently are the funded grants data updated?

- Daily
- Weekly
- Bi-weekly
- Monthly
- Bi-Monthly
- Quarterly
- Semi-annually
- Annually
- Other
- Unable to determine

Which funding opportunities databases are used to populate your researcher profiles (choose all that apply)?

- PIVOT
- grants.gov
- SciVal
- Internal grants database(s)
- Other:
- Unable to determine

Briefly list any 'other' funding opportunities data source(s) you use here:

How are these funding opportunities data added and updated in your RNS (choose all that apply)?

- Automatically ingested
- Manually added/updated by systems administrators
- Manually added/updated by outside contractors
- Manually added/updated by users
- Data are not updated after initial load
- Unable to determine

How often are funding opportunities data updated?

- Daily
- Weekly
- Bi-weekly
- Monthly
- Bi-Monthly
- Quarterly
- Semi-annually
- Annually
- Other
- Unable to determine

Which patent databases are used to populate your researcher profiles?

- Derwent
- CAS
- Internal patents database(s)
- Other:
- Unable to determine

Briefly list any 'other' patent data source(s) you use here:

How are the patents data added / updated?

- Automatically ingested
- Manually added/updated by systems administrators
- Manually added/updated by outside contractors
- Manually added/updated by users
- Data are not updated after initial load
- Unable to determine

How often are patents data updated?

- Daily
- Weekly
- Bi-weekly
- Monthly
- Bi-Monthly
- Quarterly
- Semi-annually
- Annually
- Other
- Unable to determine

What is the source of your 'courses taught' data?

How are the 'courses taught' data added / updated?

- Automatically ingested
- Manually added/updated by systems administrators
- Manually added/updated by outside contractors
- Manually added/updated by users
- Data are not updated after initial load
- Unable to determine

How often are 'courses taught' data updated?

- Daily
- Weekly
- Bi-weekly
- Monthly
- Bi-Monthly
- Quarterly
- Semi-annually
- Annually
- Other
- Unable to determine

---

---

## Questions Related to Research Networking System Functionality

Does your RNS provide recommender functionality (i.e. is a user's profile used as a basis for the system to recommend funding opportunities or non-intuitive collaborator/mentors)?

- Yes, currently
- Yes, projected within 6 months to one year
- Yes, projected within the next 2 years
- No, but considering
- No
- Unable to determine

Does your RNS allow users to curate their own profile (choose all that apply)?

- Yes, directly by user
- Yes, through a help desk person or RNS administrator
- Yes, though a designated proxy
- No
- Unable to determine

Does your RNS allow users to:

- Manage and generate CVs?
- Manage and generate NIH format biosketches?
- Both CVs AND biosketches
- Neither
- Unable to determine

Does your RNS tool allow you to export publication or other data?

- Yes, currently
- Yes, projected within 6 months to one year
- Yes, projected within the next 2 years
- No, but considering
- No
- Unable to determine

Which export formats are supported?

- EndNote
- RefWorks
- Plain text
- Rich Text Format
- HTML
- XML
- Other:
- Unable to determine

If you chose 'other', please list the other formats here:

Is your RNS integrated with a promotion / tenure process?

- Yes, currently
- Yes, projected within 6 months to one year
- Yes, projected within the next 2 years
- No, but considering
- No
- Unable to determine

Is your RNS integrated with a faculty productivity tool (e.g. Digital Measures, Academic Analytics, etc.)?

- Yes, currently
- Yes, projected within 6 months to one year
- Yes, projected within the next 2 years
- No, but considering
- No
- Unable to determine

Briefly list any faculty productivity tools integrated with your RNS (e.g. Digital Measures, Academic Analytics, etc.) here:

Does your RNS tool provide functionality which allows observation of trends in research and scholarly activity over various time periods?

- Yes, currently
- Yes, projected within 6 months to one year
- Yes, projected within the next 2 years
- No, but considering
- No
- Unable to determine

Does your RNS tool provide network analysis functionality for the researcher networks, e.g. for visualizing co-author networks?

- Yes, currently
- Yes, projected within 6 months to one year
- Yes, projected within the next 2 years
- No, but considering
- No
- Unable to determine

Have you already integrated, or do you have plans to integrate, your RNS with other information / data systems, tools, add-ons, widgets, OR open-social gadgets?

- Yes, currently
- Yes, projected within 6 months to one year
- Yes, projected within the next 2 years
- No, but considering
- No
- Unable to determine

Please list the information / data systems, tools, add-ons, widgets, Open-Social gadgets that are currently integrated or planned to be integrated with your RNS:

Is your RNS connected to similar RNS networks outside of your institution (e.g. Direct2Experts, VIVOsearch, SciVal Implementations Network, etc.) or to other external networks (e.g. physicians networks, provider networks, disease networks, community partners, Physician-Based Research Networks, pharma R&D, etc.)?

- Yes, currently
- Yes, projected within 6 months to one year
- Yes, projected within the next 2 years
- No, but considering
- No
- Unable to determine

Which networks is your RNS connected to?

- Direct2experts.org
- VIVOsearch.org
- SciVal Implementations Network
- Other:
- Unable to determine

If you chose 'other', please list here:



---

---

## Questions Related to your RNS's Cost and Value

Do you collect any metrics related to the use of your RNS tool(s)?

- Yes  No  Unable to determine

Briefly list and / or describe your use metrics here:

Do you collect data to measure the value and impact of your RNS tool(s)?

- Yes  No  Unable to determine

Briefly list and / or describe the value measures and related data you're collecting:

Please estimate the capital cost to implement your RNS tool(s) up through its first release to a user population (please consider hardware and software costs, content costs, marketing and training costs, etc.).

- &#8804; \$50,000  
 &#8804; \$100,000  
 &#8804; \$250,000  
 &#8804; \$500,000  
 &#8804; \$1,000,000  
 &#8805; \$1,000,000  
 Prefer not to answer  
 Unable to determine

Please estimate the FTEs allocated for implementation or planned implementation of your RNS up through its first release to a user population (please consider systems administration, development, project management, training, communications, etc.).

- < 0.25 FTE  
 0.25 - 0.5 FTE  
 0.5 - 1.0 FTE  
 1.0 - 2.0 FTE  
 2.0 - 3.0 FTE  
 3.0 - 4.0 FTE  
 4.0 - 5.0 FTE  
 > 5.0 FTE  
 Prefer not to answer  
 Unable to determine

Please estimate the (non-personnel) costs for annual maintenance of your RNS (please include software costs, content costs, marketing and training costs, etc.).

- &#8804; \$50,000  
 &#8804; \$100,000  
 &#8804; \$250,000  
 &#8804; \$500,000  
 &#8804; \$1,000,000  
 &#8805; \$1,000,000  
 Prefer not to answer  
 Unable to determine

Please estimate the FTEs required for on-going support for your RNS.

- < 0.25 FTE
- 0.25 - 0.5 FTE
- 0.5 - 1.0 FTE
- 1.0 - 2.0 FTE
- 2.0 - 3.0 FTE
- 3.0 - 4.0 FTE
- 4.0 - 5.0 FTE
- > 5.0 FTE
- Prefer not to answer
- Unable to determine

---

---

**Your Comments:**

Please describe any aspect of your institution's Research Networking System that wasn't adequately surveyed above. You can include any details you'd like - its development details; functionality not surveyed here; history and timeline; technical details; future plans ... Whatever you'd like to be known about your system, please describe it here:
